# Supplementary material for: Thermococcus Eurythermalis Endonuclease IV Can Cleave Various Apurinic/Apyrimidinic Site Analogues in ssDNA and dsDNA
Source: PubMed Central journal article supplement (PMC6341776; doi:10.3390/ijms20010069), 2018-12-24
Supplement: ijms-20-00069-s001.pdf [file ijms-20-00069-s001.pdf]

***Thermococcus eurythermalis* endonuclease IV can cleave various apurinic/apyrimidinic site analogues in ssDNA and dsDNA**

Wei-Wei Wang <sup>1,†</sup>, Huan Zhou <sup>2,†</sup>, Juan-Juan Xie <sup>1</sup>, Gang-Shun Yi <sup>1</sup>, Jian-Hua He <sup>2</sup>, Feng-Ping Wang <sup>1,3</sup>, Xiang Xiao <sup>1,3</sup> and Xi-Peng Liu <sup>1,3,\*</sup>

<sup>1</sup> State Key Laboratory of Microbial Metabolism, School of Life Sciences and Biotechnology, Shanghai Jiao Tong University, 800 Dong-Chuan Road, Shanghai 200240, China; [www1037554814@sjtu.edu.cn](mailto:www1037554814@sjtu.edu.cn) (W.W.W.); [purplexjj@163.com](mailto:purplexjj@163.com) (J.J.X.); [13166228531@163.com](mailto:13166228531@163.com) (G.S.Y.); [fengpingw@sjtu.edu.cn](mailto:fengpingw@sjtu.edu.cn) (F.P.W.); [zxiao2018@sjtu.edu.cn](mailto:zxiao2018@sjtu.edu.cn) (X.X.)

<sup>2</sup> Shanghai Institute of Applied Physics, Chinese Academy of Sciences, No. 239 Zhangheng Road, Shanghai 201204, China; [zhouhuan@sinap.ac.cn](mailto:zhouhuan@sinap.ac.cn) (H.Z.); [hejianhua@sinap.ac.cn](mailto:hejianhua@sinap.ac.cn) (J.H.H.)

<sup>3</sup> State Key Laboratory of Ocean Engineering, School of Naval Architecture, Ocean and Civil Engineering, Shanghai Jiao Tong University, 800 Dong-Chuan Road, Shanghai 200240, China

\* Correspondence: [xpliu@sjtu.edu.cn](mailto:xpliu@sjtu.edu.cn)

† These authors contributed equally to this work.

## Supplementary materials

### Supplementary Figures

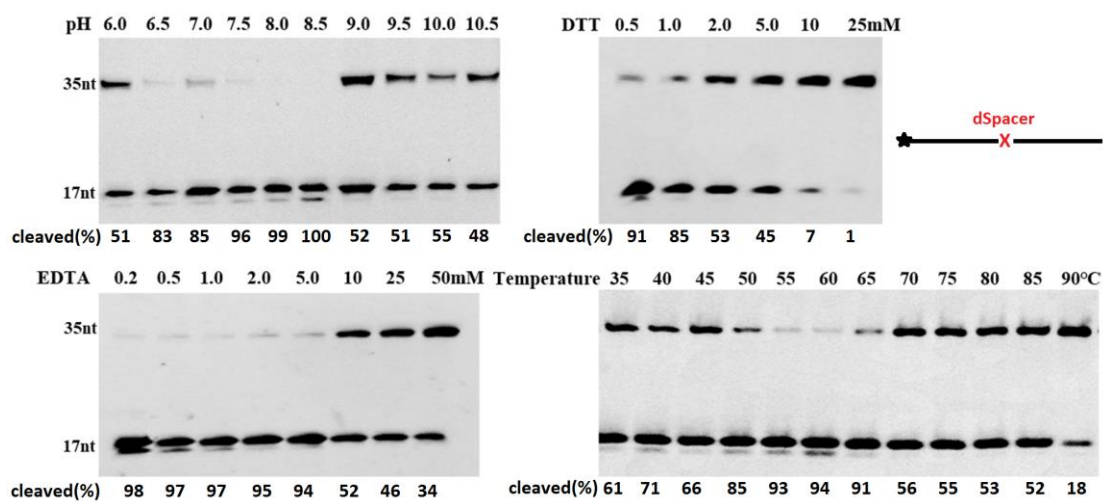

**Figure S1 Optimization of reaction conditions.** The pH value, concentrations of EDTA and DTT, and reaction temperature were sequentially optimized. The cleavage percentages of substrates are listed at the bottom of each panel.

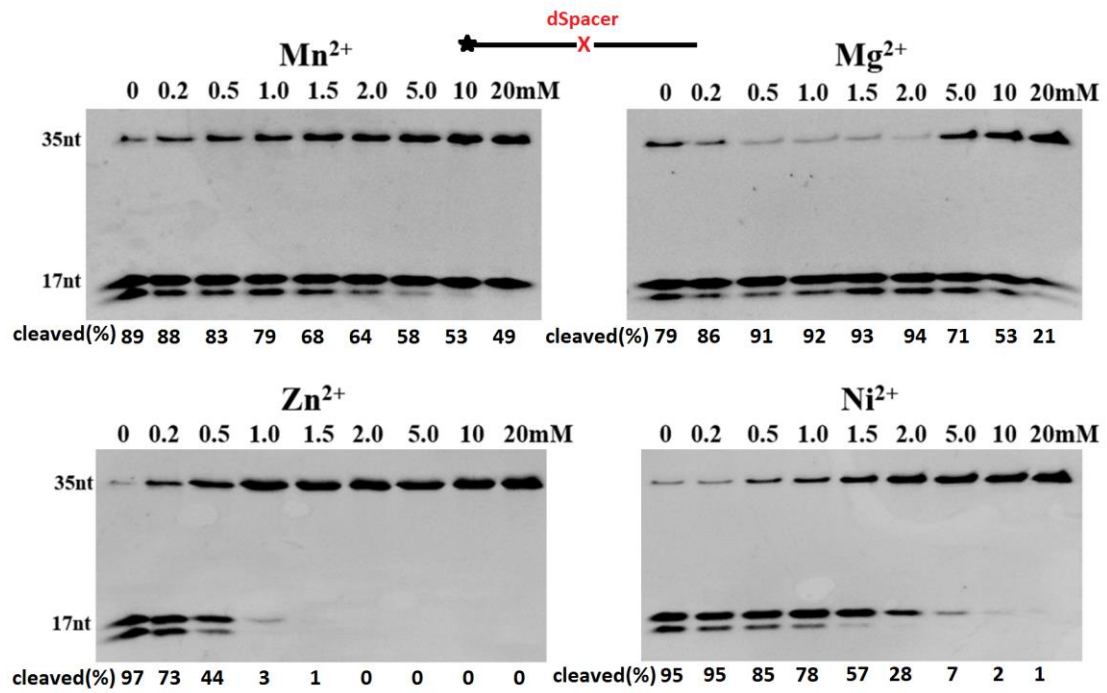

**Figure S2 Optimization of divalent metal ions.** Different concentrations of Zn<sup>2+</sup>, Mg<sup>2+</sup>, Ni<sup>2+</sup>, and Mn<sup>2+</sup> were included in the optimized reaction buffer for the assays of AP endonuclease activity. The cleavage percentages of substrates are listed at the bottom of each panel.

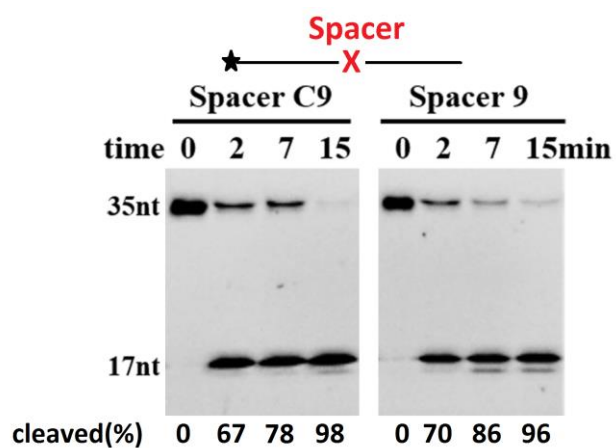

**Figure S3 Cleavage of ssDNAs containing Spacer C9 or 9.** SsDNAs (100 nM) containing an internal Spacer C9 or Spacer 9 were incubated with TeuendoIV (5 nM) at 55°C for the indicated time in the optimized reaction buffer. The cleavage percentages of substrates are listed at the bottom of each panel.

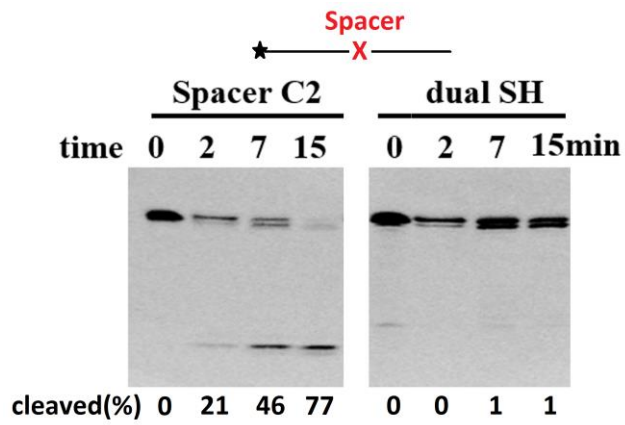

**Figure S4 Cleavage of ssDNAs containing single Spacer C2 or Dual SH.** SsDNAs (100 nM) containing one Spacer C2 or Dual SH were incubated with TeuendoIV (50 nM) at 55°C for the indicated time. The cleavage percentages of substrates are listed at the bottom of each panel.

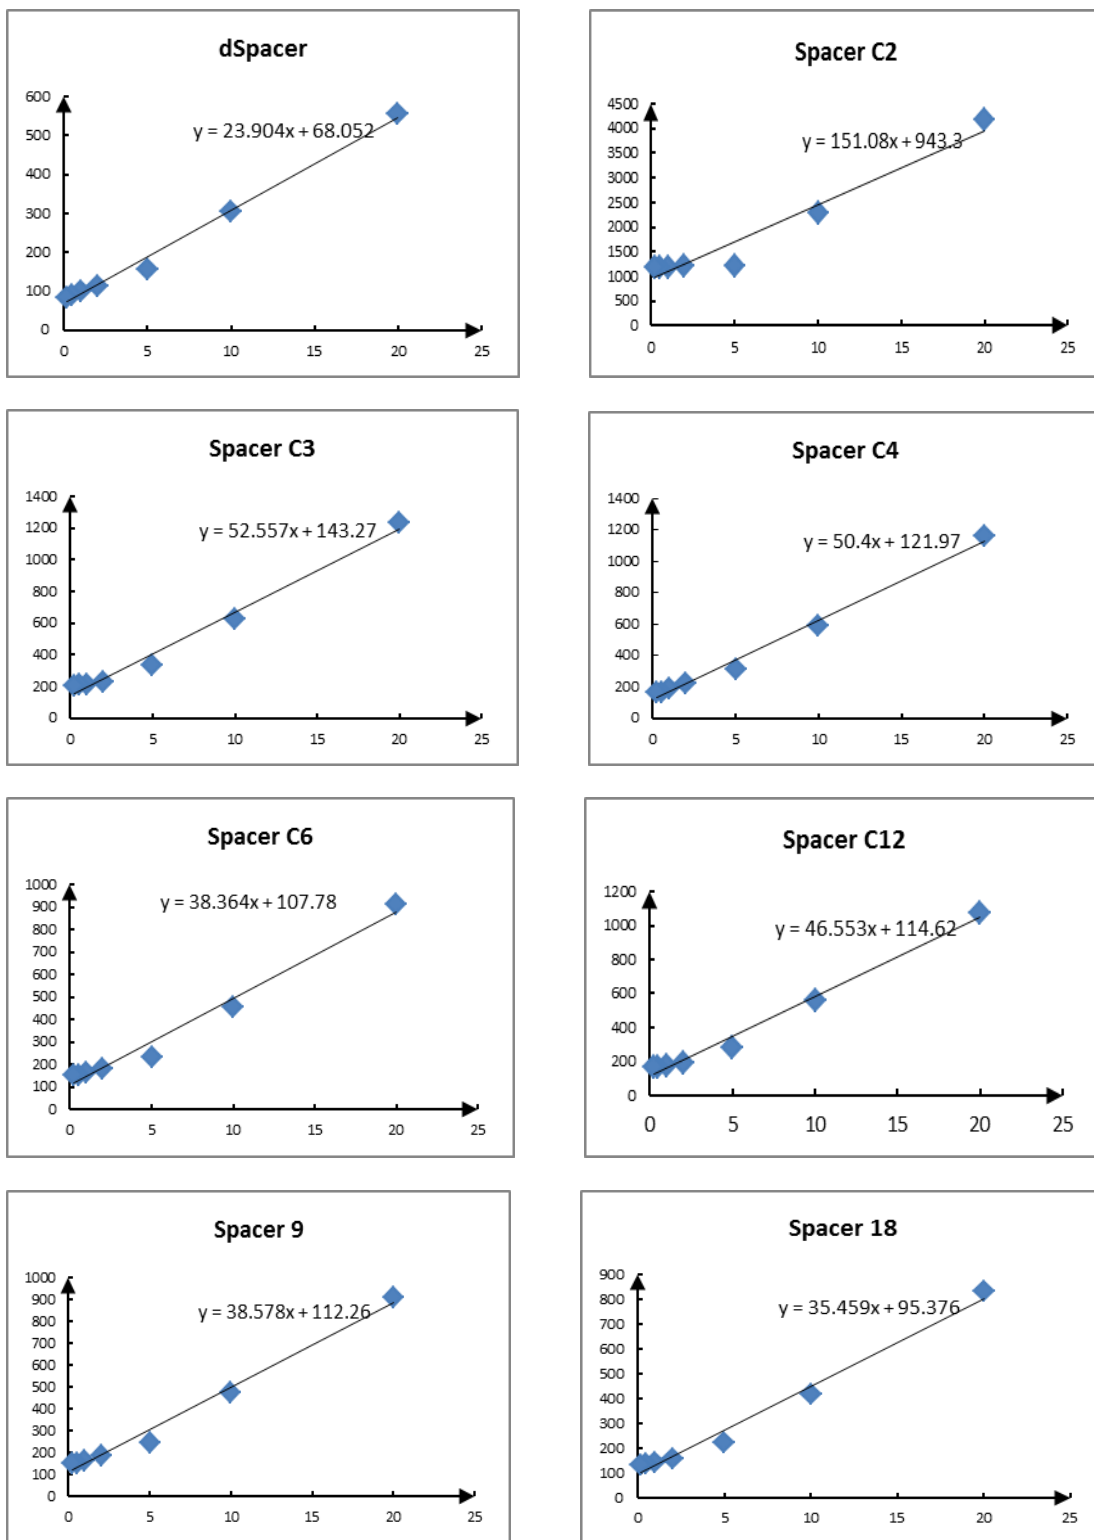

Fig. S5 Graphs of the double reciprocal plotting of various AP-site analogues.

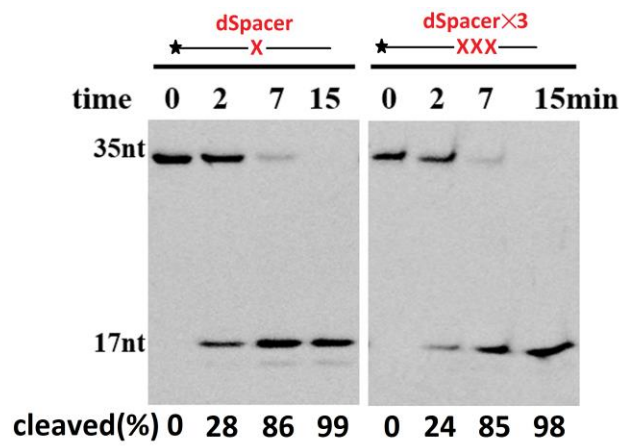

**Figure S6 Cleavage of ssDNAs containing one or three clustered dSpacers.** SsDNAs (100 nM) containing one or three internal dSpacers were incubated with TeuendoIV (5 nM) at 55°C for the indicated time in the optimized reaction buffer. The cleavage percentages of substrates are listed at the bottom of each panel.

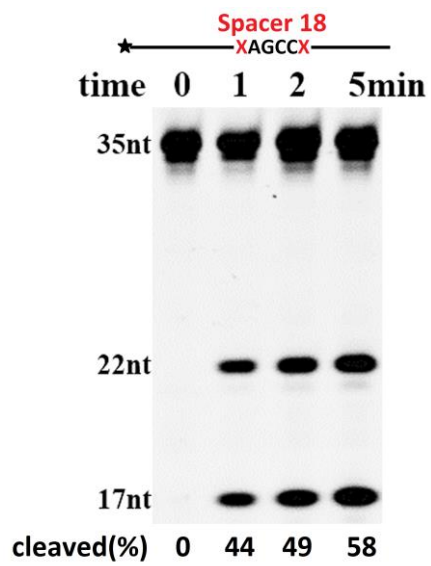

**Figure S7** Cleavage of ssDNA containing two Spacer 18s separated by four normal nucleotides. The ssDNAs (100 nM) were incubated with TeuendoIV (2 nM) at 55°C for the indicated time in the optimized reaction buffer. The cleavage percentages of substrates are listed at the bottom of each panel.



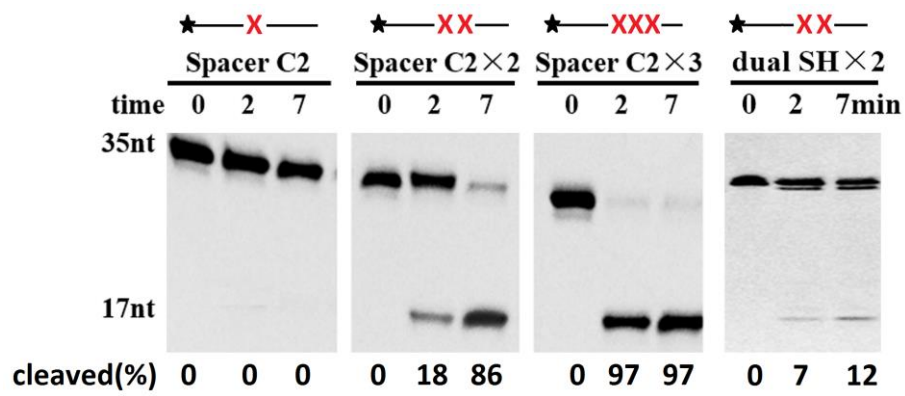

**Figure S8 Cleavage of ssDNAs containing one or clustered Spacer C2 and dual SH.** SsDNAs (100 nM) containing 1-3 internal Spacer C2s or dual SH were incubated with TeuendoIV (5 nM for Spacer C2 and 50 nM for Spacer dual SH) at 55°C for the indicated time. The cleavage percentages of substrates are listed at the bottom of each panel.

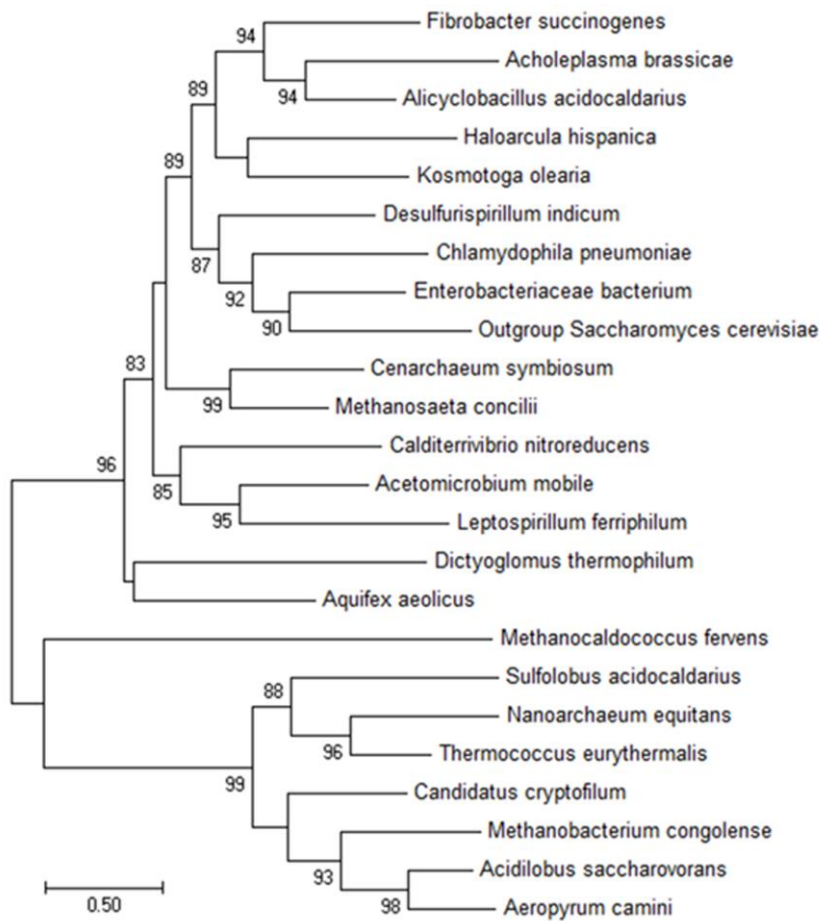

**Figure S9 Phylogenetic tree of EndoIV.** Selected EndoIV from typical bacteria and archaea were used to construct the phylogenetic tree. The bootstrap values are listed at the branch.

## Supplementary Tables

**Table S1 Oligonucleotides used for constructing plasmids**

| Oligos      | Sequences (5' – 3') <sup>a</sup>     | Comments  |
|-------------|--------------------------------------|-----------|
| TeuendoIV-F | tgaaac <b>catatg</b> aaagtacttctcctc | TeuEndoIV |
| TeuendoIV-R | ttgcttc <b>gggatcc</b> aaaag cac     |           |
| H70A-F      | ctgct cacagctGCc gcgccctact acat     | H70A      |
| H70A-R      | agtagggcgc gGCagctgtg agcaggacg      |           |
| Y73A-F      | tcac gcgcccGCct acatcaacct caacg     | Y73A      |
| Y73A-R      | g aggttgatgt agGCgggcgc gtgagctg     |           |
| N76A-F      | ccctact acatcGCcct caacgcgagc ga     | N76A      |
| N76A-R      | tcgcgttg aggGCgatgt agtagggcgc g     |           |
| H110A-F     | agcgt cgttttcGCc gccggctact acct     | H110A     |
| H110A-R     | agtagccggc gGCgaaaacg acgctccag      |           |
| R231A-F     | a gggcgagaag GCgcacctga acctccag     | R231A     |
| R231A-R     | aggt tcaggtgcGC cttctcgccc ttatc     |           |
| H232N-F     | gcgagaag aggGCcctga acctccagga g     | H232N     |
| H232N-R     | tggaggt tcaggGCcct cttctcgccc tt     |           |

<sup>a</sup> The changed bases are shown in uppercase letters.

**Table S2 Oligonucleotides used for analyzing enzymatic activity**

| Sequences (5'-3') <sup>a</sup>       | Damages                   | Figures                |
|--------------------------------------|---------------------------|------------------------|
| *CAGCCAGGTGTCTCACTXAGCCGACTCGCCACAGT | X=dU                      | 1b                     |
| *CAGCCAGGTGTCTCACTXAGCCGACTCGCCACAGT | X=Spacer C2               |                        |
| *CAGCCAGGTGTCTCACTXAGCCGACTCGCCACAGT | X=Spacer C3               |                        |
| *CAGCCAGGTGTCTCACTXAGCCGACTCGCCACAGT | X=Spacer C4               |                        |
| *CAGCCAGGTGTCTCACTXAGCCGACTCGCCACAGT | X=Spacer C6               |                        |
| *CAGCCAGGTGTCTCACTXAGCCGACTCGCCACAGT | X=Spacer C9               |                        |
| *CAGCCAGGTGTCTCACTXAGCCGACTCGCCACAGT | X=Spacer C12              | 3,4,5,<br>S1-3,S4,S6-7 |
| *CAGCCAGGTGTCTCACTXAGCCGACTCGCCACAGT | X=dSpacer                 |                        |
| *CAGCCAGGTGTCTCACTXAGCCGACTCGCCACAGT | X=Spacer 9                |                        |
| *CAGCCAGGTGTCTCACTXAGCCGACTCGCCACAGT | X=Spacer 18               |                        |
| *CAGCCAGGTGTCTCACTXAGCCGACTCGCCACAGT | X=Dual SH                 |                        |
| *CAGCCAGGTGTCTCACTXAGCCGACTCGCCACAGT | X=S-S                     |                        |
| *CAGCCAGGTGTCTCACTXXGCCGACTCGCCACAGT | X=Spacer C12X2            |                        |
| *CAGCCAGGTGTCTCACTXXGCCGACTCGCCACAGT | X=Spacer 18X2             |                        |
| *CAGCCAGGTGTCTCACTXXXCCGACTCGCCACAGT | X=Spacer 18X3             | 4, S5                  |
| *CAGCCAGGTGTCTCACTXXXXXXCTCGCCACAGT  | X=Spacer 18X7             |                        |
| *CAGCCAGGTGTCTCACTXYGCCGACTCGCCACAGT | X=Spacer 18, Y=Spacer C12 |                        |
| *CAGCCAGGTGTCTCACTYXGCCGACTCGCCACAGT | X=Spacer 18, Y=Spacer C12 |                        |
| *CAGCCAGGTGTCTCACTXAGCCXACTCGCCACAGT | X=Spacer 18               |                        |
| *CAGCCAGGTGTCTCACTXYXCCGACTCGCCACAGT | X=Spacer 18, Y=Spacer C12 |                        |
| *CAGCCAGGTGTCTCACTXYXCCGACTCGCCACAGT | X=Spacer 18, Y=Spacer 9   |                        |
| *CAGCCAGGTGTCTCACTXYXCCGACTCGCCACAGT | X=Spacer 18, Y=Spacer C2  |                        |
| *CAGCCAGGTGTCTCACTXXXCCGACTCGCCACAGT | X=dSpacer                 | S4                     |
| *CAGCCAGGTGTCTCACTXXGCCGACTCGCCACAGT | X=Spacer C2               | S6                     |
| *CAGCCAGGTGTCTCACTXXXCCGACTCGCCACAGT | X=Spacer C2               |                        |
| *CAGCCAGGTGTCTCACTXXGCCGACTCGCCACAGT | X=Dual SH                 | S7                     |
| TXAGCCGACTCGCCACAGT*                 | X=Spacer C6               |                        |
| CTXAGCCGACTCGCCACAGT*                | X=Spacer C6               |                        |
| CACTXAGCCGACTCGCCACAGT*              | X=Spacer C6               |                        |
| TCTCACTXAGCCGACTCGCCACAGT*           | X=Spacer C6               |                        |
| *CAGCCAGGTGTCTCACTXA                 | X=Spacer C6               |                        |
| *CAGCCAGGTGTCTCACTXAG                | X=Spacer C6               | 6                      |
| *CAGCCAGGTGTCTCACTXAGCC              | X=Spacer C6               |                        |
| *CAGCCAGGTGTCTCAXXAGCCGACTCGCCACAGT  | X=Spacer C6               |                        |
| *CAGGTGTCTCACTXXX                    | X=Spacer C6               |                        |
| *CAGGTGTCTCACTXXXC                   | X=Spacer C6               |                        |
| *CAGGTGTCTCACTXXXCCG                 | X=Spacer C6               |                        |
| *CAGCCAGGTGTCTCACTX                  | X=Spacer C3               |                        |
| *CAGCCAGGTGTCTCACTX                  | X=Spacer C6               | 7                      |
| *CAGCCAGGTGTCTCACTX                  | X=Spacer C12              |                        |

\*CAGCCAGGTGTCTCACT

---

|                                     |                      |          |
|-------------------------------------|----------------------|----------|
| ACTGTGGCGAGTCGGCTAAGTGAGACACCTGGCTG | complementary strand |          |
| ACTGTGGCGAGTCGGCTTAGTGAGACACCTGGCTG | complementary strand | 2b,5,7,8 |
| ACTGTGGCGAGTCGGCTCAGTGAGACACCTGGCTG | complementary strand |          |
| ACTGTGGCGAGTCGGCTGAGTGAGACACCTGGCTG | complementary strand |          |

---

<sup>a</sup> Asterisks denote the fluorescein (6-FAM) group at the 5'- or 3'-end. The damaged bases (AP site analogues or dU) are denoted by the letters X and Y in the sequences and are annotated in the "Damage" column. The damage-containing strands are shown in blue with the Spacer damage in red, and the complementary strands are shown in black.

**Table S3 EndoIV used for constructing phylogenetic tree**

| <b>Strain name</b>                     | <b>Protein Name</b>                | <b>Gene locus</b> | <b>Lineage</b> |
|----------------------------------------|------------------------------------|-------------------|----------------|
| <i>Acidilobus saccharovorans</i>       | Endonuclease IV                    | ASAC_1468         | Archaea        |
| <i>Aeropyrum camini</i>                | Endonuclease IV                    | ACAM_1316         | Archaea        |
| <i>Korarchaeum cryptofilum</i>         | Endonuclease IV                    | Kcr_0075          | Archaea        |
| <i>Cenarchaeum symbiosum</i>           | Endonuclease IV                    | CENSYa_1925       | Archaea        |
| <i>Haloarcula hispanica</i>            | Endonuclease IV                    | HAH_2520          | Archaea        |
| <i>Methanobacterium congolense</i>     | Putative endonuclease 4            | MCBB_0201         | Archaea        |
| <i>Methanocaldococcus fervens</i>      | Putative endonuclease 4            | Mefer_1095        | Archaea        |
| <i>Methanosaeta concilii</i>           | Apurinic-apyrimidinic endonuclease | MCON_1877         | Archaea        |
| <i>Nanoarchaeum equitans</i>           | NEQ077a                            | NEQ077a           | Archaea        |
| <i>Sulfolobus acidocaldarius</i>       | Endonuclease IV                    | Saci_0015         | Archaea        |
| <i>Fibrobacter succinogenes</i>        | Apurinic endonuclease Apn1         | FSU_2936          | Bacteria       |
| <i>Acetomicrobium mobile</i>           | Apurinic endonuclease APN1         | Anamo_0665        | Bacteria       |
| <i>Acholeplasma brassicae</i>          | Endodeoxyribonuclease IV           | BN85311130        | Bacteria       |
| <i>Alicyclobacillus acidocaldarius</i> | Deoxyribonuclease IV               | Aaci_1017         | Bacteria       |
| <i>Aquifex aeolicus</i>                | Endonuclease IV                    | Aq_1629           | Bacteria       |
| <i>Calditerrivibrio nitroreducens</i>  | Deoxyribonuclease IV               | Calni_1384        | Bacteria       |
| <i>Chlamydophila pneumoniae</i>        | Endonuclease IV                    | CP_0014           | Bacteria       |
| <i>Desulfurispirillum indicum</i>      | Apurinic endonuclease Apn1         | Selin_1546        | Bacteria       |
| <i>Dictyoglomus thermophilum</i>       | Endonuclease IV                    | DICTH_1988        | Bacteria       |
| <i>Enterobacteriaceae bacterium</i>    | Endonuclease IV                    | F652_1793         | Bacteria       |
| <i>Kosmotoga olearia</i>               | Apurinic endonuclease Apn1         | Kole_0273         | Bacteria       |
| <i>Leptospirillum ferriphilum</i>      | Apurinic endonuclease              | LFML04_0897       | Bacteria       |
| <i>Saccharomyces cerevisiae</i>        | APN2                               | YBL019W           | Eukaryota      |

Table S4 The maximum values of product amount and the initial rates during the incubation period

| Substrate concentration ( $\mu\text{M}$ ) |                                           | 0.05    | 0.1     | 0.2     | 0.5     | 1.0     | 2.0     | 5.0     |
|-------------------------------------------|-------------------------------------------|---------|---------|---------|---------|---------|---------|---------|
| dSpacer                                   | Cleaved substrate (%)                     | 18.0    | 16.5    | 16.0    | 8.9     | 5.1     | 2.8     | 1.2     |
|                                           | Initial rate ( $\mu\text{M}/\text{min}$ ) | 0.0018  | 0.0033  | 0.0064  | 0.0089  | 0.01    | 0.011   | 0.012   |
| Spacer C2                                 | Cleaved substrate (%)                     | 14.0    | 13.2    | 12.2    | 4.9     | 2.5     | 1.3     | 0.5     |
|                                           | Initial rate ( $\mu\text{M}/\text{min}$ ) | 0.00023 | 0.00044 | 0.00081 | 0.00082 | 0.00083 | 0.00087 | 0.00083 |
| Spacer C3                                 | Cleaved substrate (%)                     | 8.1     | 8.1     | 7.3     | 4.4     | 2.4     | 1.2     | 0.5     |
|                                           | Initial rate ( $\mu\text{M}/\text{min}$ ) | 0.00081 | 0.0016  | 0.003   | 0.0044  | 0.0048  | 0.0048  | 0.005   |
| Spacer C4                                 | Cleaved substrate (%)                     | 8.6     | 8.4     | 8.0     | 4.5     | 2.7     | 1.5     | 0.6     |
|                                           | Initial rate ( $\mu\text{M}/\text{min}$ ) | 0.00086 | 0.0017  | 0.0032  | 0.0045  | 0.0054  | 0.006   | 0.006   |
| Spacer C6                                 | Cleaved substrate (%)                     | 11.1    | 11.0    | 10.6    | 5.6     | 3.1     | 1.6     | 0.7     |
|                                           | Initial rate ( $\mu\text{M}/\text{min}$ ) | 0.0011  | 0.0022  | 0.0043  | 0.0056  | 0.0062  | 0.0065  | 0.0067  |
| Spacer C12                                | Cleaved substrate (%)                     | 9.3     | 9.2     | 9.2     | 5.2     | 2.9     | 1.5     | 0.6     |
|                                           | Initial rate ( $\mu\text{M}/\text{min}$ ) | 0.00093 | 0.0018  | 0.0036  | 0.0052  | 0.0058  | 0.0061  | 0.006   |
| Spacer 9                                  | Cleaved substrate (%)                     | 11.0    | 10.5    | 10.2    | 5.4     | 3.1     | 1.6     | 0.7     |
|                                           | Initial rate ( $\mu\text{M}/\text{min}$ ) | 0.0011  | 0.0021  | 0.0041  | 0.0054  | 0.0062  | 0.0065  | 0.0067  |
| Spacer 18                                 | Cleaved substrate (%)                     | 11.9    | 11.8    | 11.3    | 6.4     | 3.5     | 1.8     | 0.8     |
|                                           | Initial rate ( $\mu\text{M}/\text{min}$ ) | 0.0012  | 0.0024  | 0.0045  | 0.0064  | 0.007   | 0.0073  | 0.0076  |

The percentage of substrate converted to product during the incubation period, and the initial rates at the increasing substrate concentrations of various AP-site analogues are listed.
